# Supplementary material for: Enhancing the efficiency of PVDF-based piezoelectric catalysis through water-induced polarization and a micro-nano-composite strategy
Source: Royal Society of Chemistry journal article supplement (doi:10.1039/d4nr03221g), 2024-01-01
Supplement: d4nr03221g1.pdf [file d4nr03221g1.pdf]

## **Supporting Information**

### **Enhancing the Efficiency of PVDF-Based Piezoelectric Catalysis through Water-Induced Polarization and Micro-Nano Composite Strategy**

Haitao Li,<sup>\*a</sup> Yingying Zhang,<sup>a,b</sup> Han Dai,<sup>a</sup> Veronica Pereira,<sup>c</sup> Junfeng Zhao<sup>\*a</sup> and Hiang Kwee Lee<sup>\*c, d</sup>

<sup>a</sup>Laboratory of Advanced Light Alloy Materials and Devices, Postdoctoral Workstation of Nanshan Group Co., Ltd., Yantai Nanshan University, Longkou 265713, China.

<sup>b</sup>School of Chemistry and Chemical Engineering, Yangzhou University, Yangzhou, 225002, PR China.

<sup>c</sup>Division of Chemistry and Biological Chemistry, School of Chemistry, Chemical Engineering and Biotechnology, Nanyang Technological University, 21 Nanyang Link, 637371 Singapore

<sup>d</sup>Institute of Materials Research and Engineering, The Agency for Science, Technology and Research (A\*STAR), 2 Fusionopolis Way, #08-03, Innovis 138634, Singapore

*Corresponding Author*

*E-mail address:* htli@yzu.edu.cn (Haitao Li); zhaojunfengcc@163.com (Junfeng Zhao); hiangkwee@ntu.edu.sg (Hiang Kwee Lee)

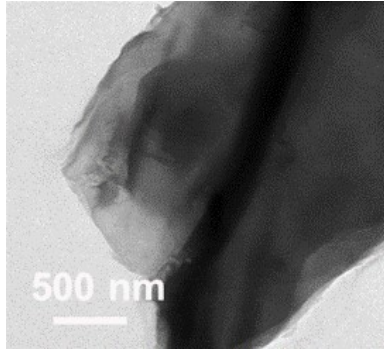

**Figure S1.** TEM image of rGO.

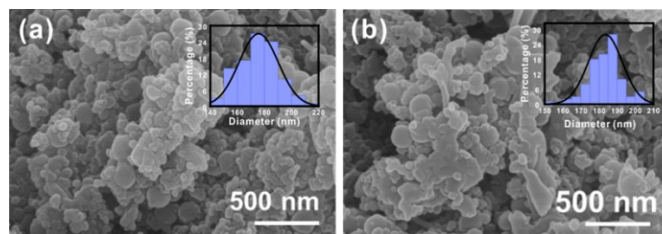

**Figure S2.** SEM images of (a) self-polarized PVDF (SP) and (b) self-polarized rGO/PVDF (SP/rGO).

## The calculation of $\beta$ phase content and related crystallinity

(1) The calculation of  $\beta$  phase: FTIR absorption was assumed to obey the Lambert-Beer law, the amount of the  $\beta$ -phase ( $F(\beta)$ ) of PVDF was calculated using Eq (S1)<sup>1</sup>.

$$F(\beta) = \frac{A_{\beta}}{1.26A_{\alpha} + A_{\beta}} \times 100 \% \quad (S1)$$

Here,  $A_{\alpha}$  and  $A_{\beta}$ , respectively, correspond to the absorbance of the  $\alpha$  ( $762 \text{ cm}^{-1}$ ) and  $\beta$  phases ( $839 \text{ cm}^{-1}$ ) of PVDF. The  $\beta$  phase content of original PVDF, SP and SP/rGO<sub>1.5</sub> are 14%, 91%, 95%, respectively.

(2) The calculation of related crystallinity: The crystallinities of original PVDF, SP and SP/rGO<sub>1.5</sub> are calculated according to their temperature increase curves using Eq. (S2)<sup>2</sup>.

$$X_c = \frac{\Delta H_f}{\Delta H_f^* \cdot \phi} \times 100 \% \quad (S2)$$

Where  $\Delta H_f$  is the sample enthalpy of fusion, calculated from heating DSC curve,  $\Delta H_f^*$  is the heat of fusion of perfectly crystalline PVDF from literature ( $104.7 \text{ J g}^{-1}$ ) and  $\phi$  is the weight fraction of PVDF in the samples. The crystallinity for original PVDF, SCP<sub>0</sub> and SCP<sub>1.5</sub> are 23 %, 37%, 40%, respectively.

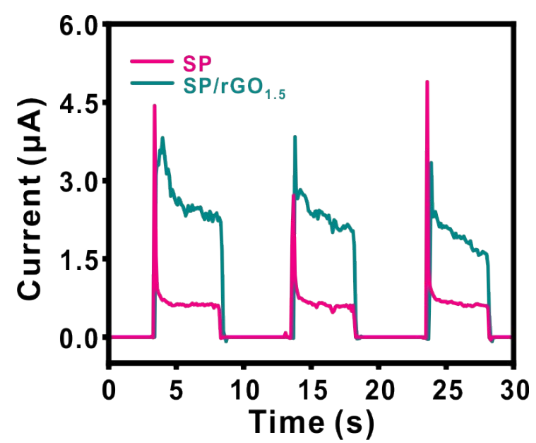

Figure S3. Piezoelectric current of (a) SP and (b) SP/rGO<sub>1.5</sub>.

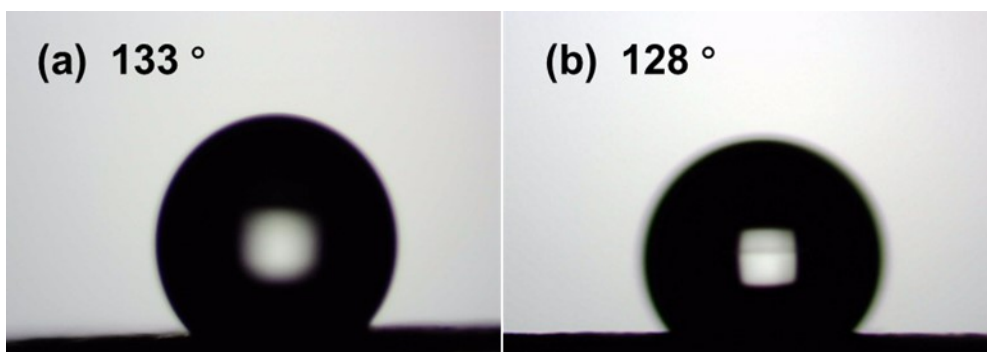

**Figure S4.** Contact angle images of a sessile water droplet on (a) SP and (b) SP/rGO<sub>1.5</sub>.

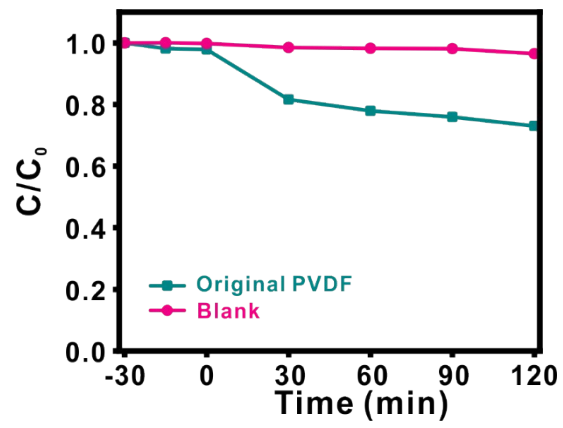

**Figure S5.** Piezocatalytic degradation of 15 mL RhB solution ( $100 \text{ mg L}^{-1}$ ,  $\text{pH}=7$ ,  $30 \text{ }^\circ\text{C}$ ) under 240 W ultrasonication. Comparison of normalized absorbance between 15 mg pristine PVDF and blank control.

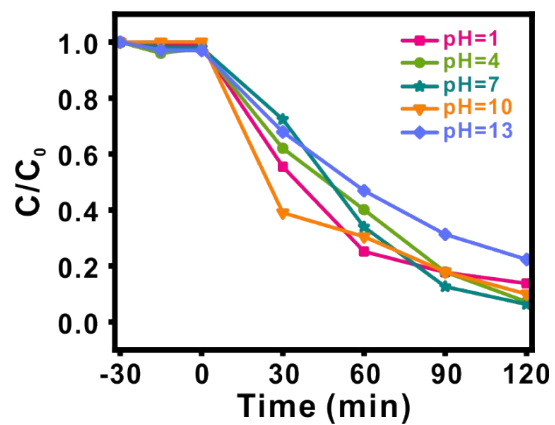

**Figure S6.** Time-dependent plot of normalized RhB concentration (15 mL, 100 mg L<sup>-1</sup>; 30 °C) under 240 W ultrasonication at different pH environment (1 - 13) and in the presence of SP/rGO<sub>1.5</sub> (15 mg).



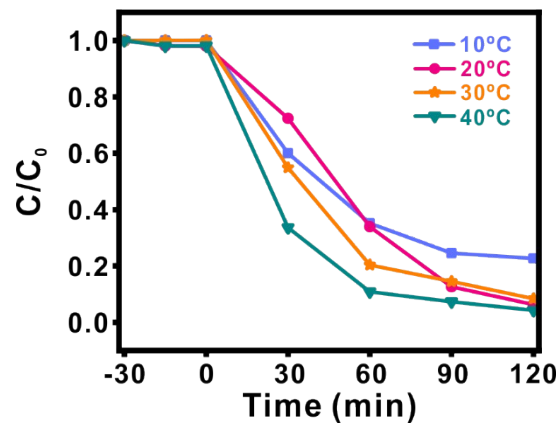

**Figure S7.** Time-dependent plot of normalized RhB concentration (15 mL; pH =7; 30 °C) under 240 W ultrasonication at different reaction temperature (10 - 40°C) and in presence of SP/rGO<sub>1.5</sub> (15 mg).

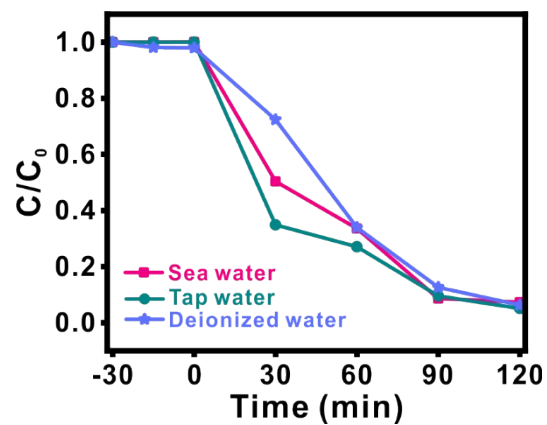

**Figure S8.** Time-dependent plot of normalized RhB concentration (15 mL; pH =7; 30 °C) under 240 W ultrasonication when using different water samples (DI water, tap water and sea water) and in the presence of SP/rGO<sub>1.5</sub> (15 mg).

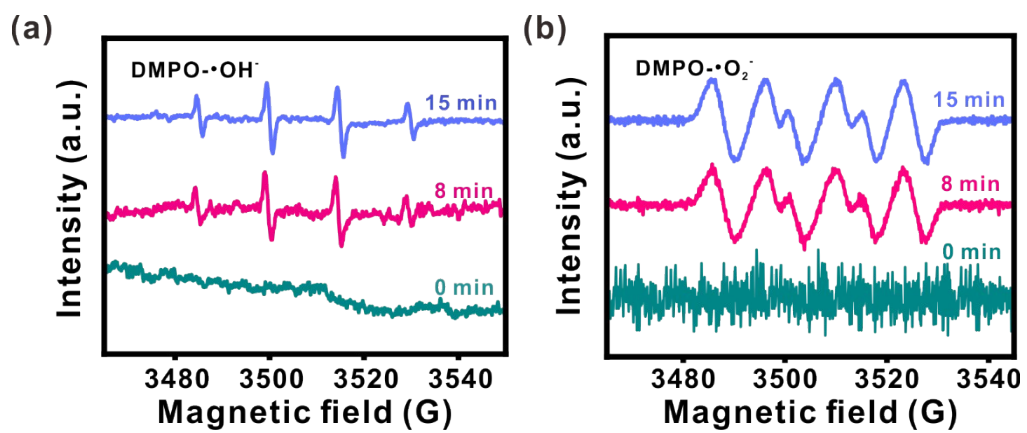

Figure S9. (a) DMPO-·OH and (b) DMPO-·O<sub>2</sub><sup>-</sup> obtained from SP/rGO<sub>1.5</sub> with different ultrasonication time.

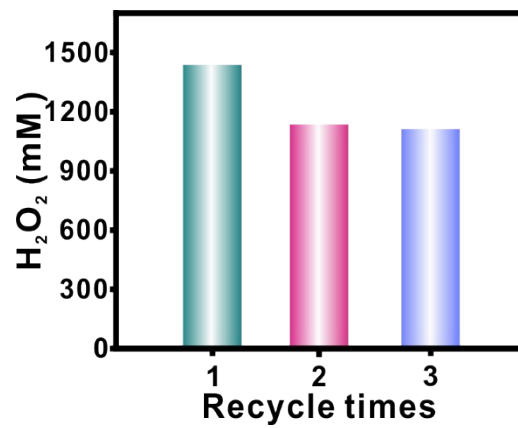

**Figure S10.** Comparison of H<sub>2</sub>O<sub>2</sub> production rate by SP/rGO<sub>1.5</sub> over three successive cycles.

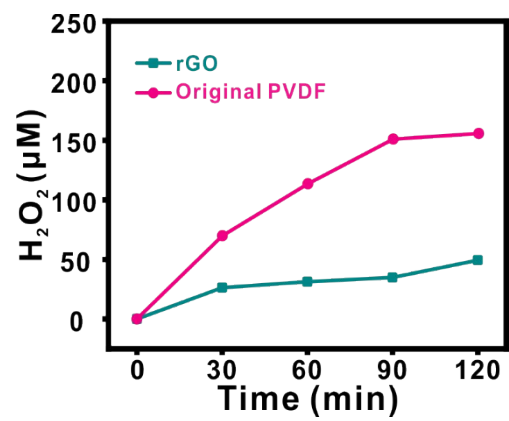

**Figure S11.** Time-dependent piezocatalytic H<sub>2</sub>O<sub>2</sub> productions by rGO and pristine PVDF under 300 W ultrasonication.

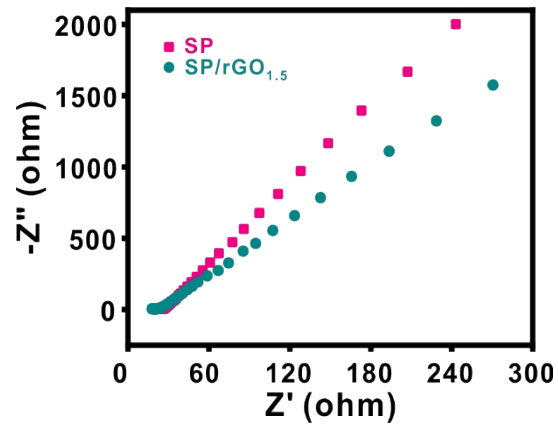

Figure S12. Electrochemical impedance spectroscopy characterization of SP and SP/rGO<sub>1.5</sub>.

**Table S1.** Comparison of the organic degradation and H<sub>2</sub>O<sub>2</sub> production by SP/rGO<sub>1.5</sub> with other previously reported piezoelectric catalysts.

| Material of catalyst, Synthesis method                                          | Content of catalyst | Reaction solution                         | Frequency and power of ultrasound | Time, min | Degradation ratio, % | Generating rate of H <sub>2</sub> O <sub>2</sub> , mmol g <sub>cat</sub> <sup>-1</sup> h <sup>-1</sup> |
|---------------------------------------------------------------------------------|---------------------|-------------------------------------------|-----------------------------------|-----------|----------------------|--------------------------------------------------------------------------------------------------------|
| Nano kaolinite-MWCNT/PVDF film <sup>3</sup><br>one-step solution casting method | 1x1cm               | 15 mL, 2.5 ppm RhB                        | 33 kHz, 50 W                      | 45        | ~96, 99              |                                                                                                        |
| Ag@LiNbO <sub>3</sub> /PVDF <sup>4</sup><br>The solvent casting method          | d=2.5 cm            | 10 mL, 10 mg/L MB                         | 40 kHz, 70 W                      | 180       | ~89                  |                                                                                                        |
| αFe <sub>2</sub> O <sub>3</sub> /PVDF <sup>5</sup><br>electrospinning           | 7 mg                | 20 mL, 10 mg/L MB                         | 18 kHz, 250 W                     | 60        | ~60.4                |                                                                                                        |
| BNT/PVDF <sup>6</sup> ,<br>a “sol-gel-electrospinning” method                   | 100 mg              | 100 mL, 50 mg/L RhB                       | 45 kHz, 200 W                     | 180       | ~76.6                |                                                                                                        |
| BNBT-x <sup>7</sup> ,<br>one-step solvothermal method.                          | 100 mg              | 50 mL, 10 mg/L RhB                        | 18 kHz, 250 W                     | 60        | ~73                  |                                                                                                        |
| PCN/PVDF-HFP <sup>8</sup>                                                       | 50 mg               | 8 mL H <sub>2</sub> O containing 2mL EtOH | 40 kHz, 300 W                     | 120       |                      | 0.668                                                                                                  |
| SiO <sub>2</sub> /PVDF-HFP <sup>9</sup>                                         | 50 mg               | 8 mL H <sub>2</sub> O containing 2mL EtOH | 40 kHz, 300 W                     | 60        |                      | 0.492                                                                                                  |
| CNT/PVDF <sup>10</sup><br>phase separation by nanosization                      | 15 mg               | 15 mL, 40 mg L <sup>-1</sup> RhB          | 40 kHz, 240 W                     | 120       | ~98                  |                                                                                                        |
|                                                                                 | 25 mg               | 8 mL H <sub>2</sub> O containing 2mL EtOH | 40 kHz, 300 W                     | 120       |                      | 13.51                                                                                                  |
| rGO/PVDF<br>phase separation by nanosization                                    | 15 mg               | 15 mL, 100 mg L <sup>-1</sup> RhB         | 40 kHz, 240 W                     | 120       | ~93.7                |                                                                                                        |
|                                                                                 | 5 mg                | 8 mL H <sub>2</sub> O containing 2mL EtOH | 40 kHz, 300 W                     | 120       |                      | 95.8                                                                                                   |

## Note and references

1. S. Huang, S. Hong, Y. Su, Y. Jiang, S. Fukushima, T. M. Gill, N. E. D. Yilmaz, S. Tiwari, K.-i. Nomura, R. K. Kalia and Flame, *Combust Flame*, 2020, **219**, 467-477.
2. C. Merlini, G. Barra, T. M. Araujo and A. Pegoretti, *RSC Adv*, 2014, **4**, 15749-15758.
3. D. Mondal, S. Bardhan, N. Das, J. Roy, S. Ghosh, A. Maity, S. Roy, R. Basu and S. Das, *Nano Energy*, 2022, **104**.
4. G. Singh, M. Sharma and R. Vaish, *ACS Appl Mater Interfaces*, 2021, **13**, 22914-22925.
5. F. Orudzhev, S. Ramazanov, D. Sobola, P. Kaspar, T. Trčka, K. Částková, J. Kasty, I. Zvereva, C. Wang, D. Selimov, R. Gulakhmedov, M. Abdurakhmanov, A. Shuaibov and M. Kadiev, *Nano Energy*, 2021, **90**.
6. X. Zhou, Q. Sun, Z. Xiao, H. Luo and D. Zhang, *J. Environ*, 2022, **10**.
7. L. Jiang, N. Xie, Y. Hou, H. Fu, J. Zhang, H. Gao and Y. Liao, *Catal Commun*, 2023, **181**, 106735.
8. Z. Chen, J. Zhuang, C. Liu, M. Chai, S. Zhang, K. Teng, T. Cao, Y. Zhang, Y. Hu, L. Zhao and Q. An, *ChemElectroChem*, 2022, **9**.
9. L. Wang, Z. Chen, Y. Zhang, C. Liu, J. Yuan, Y. Liu, W. Ge, S. Lin, Q. An and Z. Feng, *Chem Asian J*, 2022, **17**, e202200278.
10. Y. Zhang, C. Chong, W. Tong, H. Li, H. K. Lee and J. Han, *Colloids and Surfaces A: Physicochemical and Engineering Aspects*, 2023, **677**.
